# Supplementary material for: Identification of interstitial oxygen color centers in CaGdAlO 4 single crystals and their elimination strategy
Source: Royal Society of Chemistry journal article supplement (doi:10.1039/d5ce00858a), 2025-01-01
Supplement: d5ce00858a1.pdf [file d5ce00858a1.pdf]

## Supporting Information

### Identification of Interstitial Oxygen Color Centers in CaGdAlO<sub>4</sub>

#### Single Crystals and their Elimination Strategy

Fazheng Huang,<sup>†,a</sup> Xiaowei Lin,<sup>†,a</sup> Qingyi Liu,<sup>†,a</sup> Yan Yu,<sup>\*,a</sup> Dongfeng Xue,<sup>\*,b, c, d</sup> and  
Lingyun Li,<sup>\*,a,d</sup>

<sup>a</sup> Key Laboratory of Advanced Materials Technologies, International (Hong Kong Macao and Taiwan) Joint Laboratory on Advanced Materials Technologies, College of Materials Science and Engineering, Fuzhou University, Fuzhou, 350108, PR China

<sup>b</sup> University of Electronic Science and Technology of China, Chengdu, 611731, PR China

<sup>c</sup> Shenzhen Institute for Advanced Study, University of Electronic Science and Technology of China, Shenzhen, 518110, PR China

<sup>d</sup> SIAS, UESTC-JIREOIMD Joint Institute of Rare Earth Optoelectronic Information Materials and Devices, Shenzhen 518110, PR China

**Table S1. System energy and O<sub>i</sub> doping energy**

| Interstice | Average energy of system<br>(eV/atom) | E <sub>f</sub> (eV) |
|------------|---------------------------------------|---------------------|
| Non        | -7.503                                | /                   |
| Al-O       | -7.366                                | 8.145               |
| Gd/Ca-O    | -7.448                                | -1.201              |

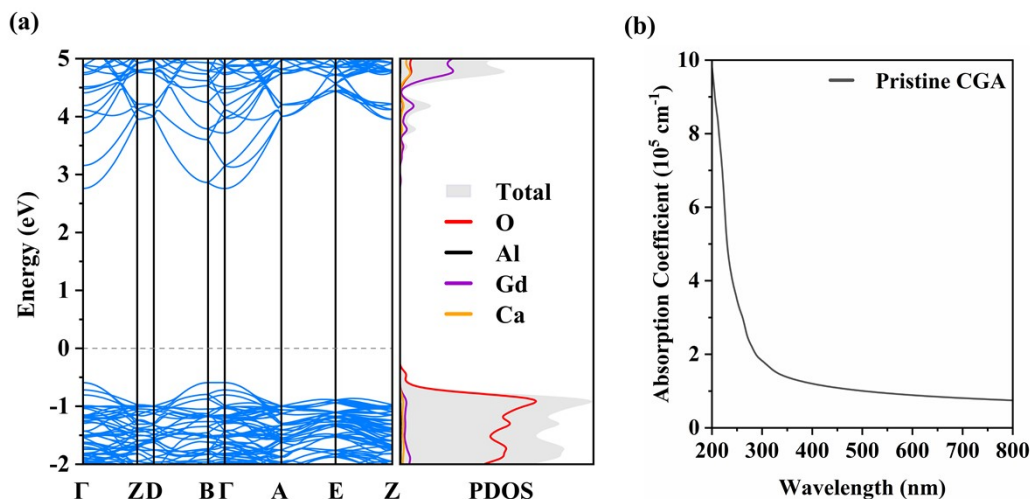

**Figure S1. (a) The electronic structure and (b) The absorption spectrum of pristine CGA**

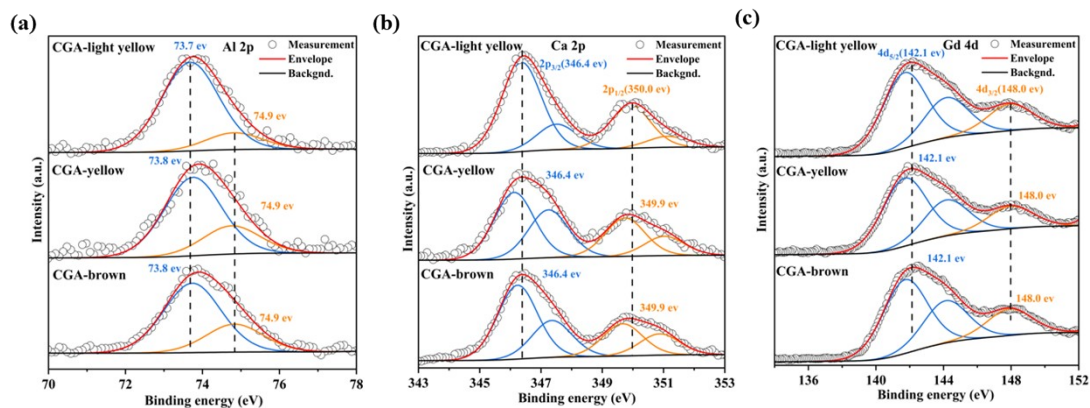

**Figure S2. The XPS spectra of (a) Al 2p, (b) Ca 2p, and (c) Gd 4d for the CGA-light yellow, CGA-yellow, and CGA-brown samples.**

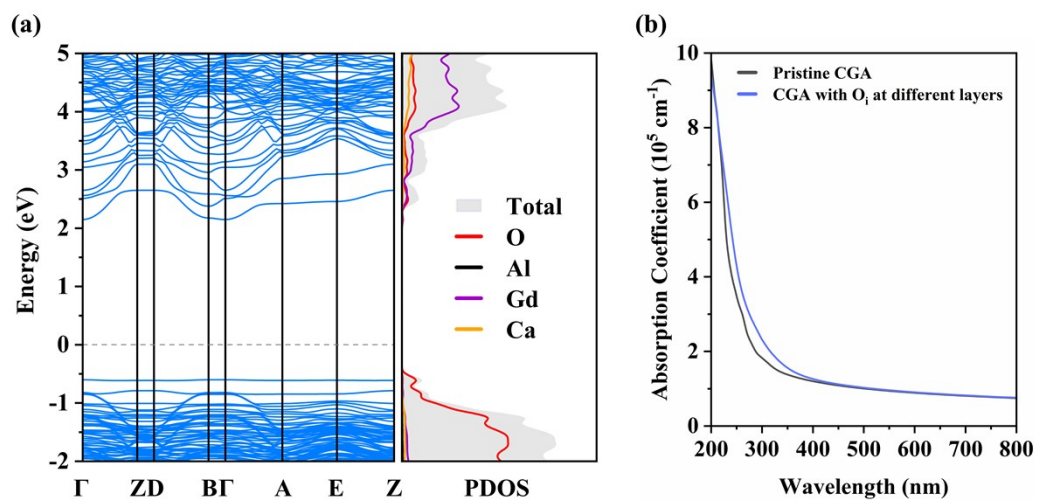

**Figure S3. (a) The electronic structure and (b) The absorption spectrum of CGA with  $O_i$  at different layers**
